# Supplementary material
Source: PubMed Central journal article supplement (PMC2926146)
Supplement: NIHMS221751-supplement-01.pdf [file NIHMS221751-supplement-01.pdf]

---

Supplementary Table S1. Mouse specific primer pairs used for real-time RT-PCR

---

| Gene                | Forward primer                 | Reverse primer                 |
|---------------------|--------------------------------|--------------------------------|
| Tg 11 $\beta$ -HSD2 | 5'-GCCCTGTTTCATGACACAACCCAG-3' | 5'-GCGAGGGGCAAAGAACAGATG-3'    |
| Col1a1              | 5'-GGTCCTCGTGGTGCTGCT-3'       | 5'-ACCTTTGCCCCCTTCTTTG-3'      |
| BSP                 | 5'-ACCCCAAGCACAGACTTTTGA-3'    | 5'-CTTTCTGCATCTCCAGCCTTCT-3'   |
| Osteocalcin         | 5'-AAGCCATACTGGTTTGATAGCTCG-3' | 5'-GAGGGCAATAAGGTAGTGAACAGA-3' |
| M-CSF               | 5'-CTCTGGCTGGCTTGGCTTGG-3'     | 5'-GCAGAAGGATGAGGTTGTG-3'      |
| RANKL               | 5'-TGGAAGGCTCATGGTTGGAT-3'     | 5'-CATTGATGGTGAGGTGTGCAA-3'    |
| OPG                 | 5'-AGCTGCTGAAGCTGTGGAA-3'      | 5'-GGTTCGAGTGGCCGAGAT-3'       |
| $\beta$ -actin      | 5'-ATGGCTGGGGTGTTGAAGGT-3'     | 5'-ATCTGGCACCACACCTTCTACAA-3'  |

---

BSP, bone sialoprotein; M-CSF, macrophage colony-stimulating factor; RANKL, receptor activator of nuclear factor kappa B ligand; OPG, osteoprotegerin

---

Supplementary Table S2. Summary of microarray analysis comparing sorted Col3.6-HSD2 (TG)/GFP+ and wild type (WT)/GFP+ cells.

---

| <u>Specifications</u>     |                | <u>Gene sets</u> |
|---------------------------|----------------|------------------|
| Total number of gene sets |                | 45992            |
| Significantly expressed   |                | 10090            |
| Differentially expressed  |                | 302              |
| 1.5-2 fold change         | Up-regulated   | 8                |
|                           | Down-regulated | 130              |
| 2-5 fold change           | Up-regulated   | 4                |
|                           | Down-regulated | 13               |
| >5 fold change            | Up-regulated   | 2                |
|                           | Down-regulated | 0                |

---

Supplementary Table S3. Selected genes showing significant changes in sorted Col3.6-HSD2 (TG)/GFP+ cells compared to wild type (WT)/GFP+ cells.

| <u>Gene name</u>                                             | <u>Symbol</u> | <u>WT</u> | <u>TG</u> | <u>Trans.<br/>Diffscore</u> |
|--------------------------------------------------------------|---------------|-----------|-----------|-----------------------------|
| Hydroxysteroid 11-beta dehydrogenase type 2                  | Hsd11b2       | -4        | 943       | 25                          |
| Cyclin D1                                                    | Ccnd1         | 364       | 203       | -12                         |
| Cyclin D2                                                    | Ccnd2         | 4148      | 2852      | -8                          |
| E2F transcription factor 1                                   | E2f1          | 555       | 420       | -9                          |
| Cyclin-dependent kinase inhibitor 2B                         | Cdkn2b        | 2002      | 932       | -25                         |
| Histone 1 H2bc                                               | Hist1h2bc     | 2117      | 1415      | -10                         |
| Histone 1 H2bh                                               | Hist1h2bh     | 905       | 687       | -9                          |
| Histone 1 H2bj                                               | Hist1h2bj     | 1533      | 1163      | -8                          |
| Histone 1 H2bl                                               | Hist1h2bl     | 1023      | 813       | -8                          |
| Histone 1 H2bn                                               | Hist1h2bn     | 886       | 608       | -11                         |
| Histone 1 H4a                                                | Hist1h4a      | 209       | 163       | -8                          |
| Histone 1 H4f                                                | Hist1h4f      | 108       | 66        | -16                         |
| Histone 1 H4i                                                | Hist1h4i      | 109       | 78        | -10                         |
| Histone 1 H4j                                                | Hist1h4j      | 152       | 117       | -8                          |
| Histone 1 H4m                                                | Hist1h4m      | 187       | 139       | -10                         |
| A disintegrin and metalloproteinase domain 9 (meltrin gamma) | Adam9         | 174       | 90        | -19                         |
| Integrin beta 5                                              | Itgb5         | 1095      | 770       | -9                          |
| Sphingosine-1-phosphate phosphatase 1                        | Sgpp1         | 106       | 64        | -11                         |
| Secreted phosphoprotein 1                                    | Spp1          | 3959      | 1692      | -13                         |
| Annexin A1                                                   | Anxa1         | 194       | 112       | -16                         |
| Caveolae protein                                             | Cav1          | 1433      | 875       | -16                         |
| Transforming growth factor beta 1 induced transcript 4       | Tgfb1i4       | 165       | 96        | -10                         |
| Matrix metalloproteinase 3                                   | Mmp3          | 107       | 61        | -13                         |
| Apolipoprotein D                                             | Apod          | 1218      | 1573      | 9                           |
| cysteine and glycine-rich protein 1                          | Csrp1         | 66        | 1025      | 21                          |

Supplementary Table S4: Microarray data

| Name                                   | Symbol  | WT | TG  | Trans. Diffscore | Sig |
|----------------------------------------|---------|----|-----|------------------|-----|
| Hydroxysteroid 11-beta dehydrogenase 1 | Hsd11b1 | 39 | 33  | -1               |     |
| Hydroxysteroid 11-beta dehydrogenase 2 | Hsd11b2 | -4 | 943 | 25               | *   |

**Osteoblast**

| Name                                                   | Symbol    | WT    | TG    | Trans. Diffscore | Sig |
|--------------------------------------------------------|-----------|-------|-------|------------------|-----|
| Procollagen type I alpha 1                             | Col1a1    | 15887 | 15918 | 0                |     |
| Integrin binding sialoprotein                          | Ibsp      | 37    | 14    | -9               |     |
| Bone gamma carboxyglutamate protein 1                  | Bglap1    | 356   | 208   | -14              | *   |
| Bone gamma-carboxyglutamate protein 2                  | Bglap2    | 563   | 379   | -8               | *   |
| Bone gamma-carboxyglutamate protein related sequence 1 | Bglap-rs1 | 342   | 214   | -10              | *   |

**Cell cycle**

| Name                                          | Symbol | WT   | TG   | Trans. Diffscore | Sig |
|-----------------------------------------------|--------|------|------|------------------|-----|
| Cyclin D1                                     | Ccnd1  | 364  | 203  | -12              | *   |
| Cyclin D2                                     | Ccnd2  | 4148 | 2852 | -8               | *   |
| Cyclin D3                                     | Ccnd3  | 4    | 8    | 2                |     |
| E2F transcription factor 1                    | E2f1   | 555  | 420  | -9               | *   |
| Tissue inhibitor of metalloproteinase 3       | Timp3  | 159  | 85   | -8               | *   |
| Cyclin B1                                     | Ccnb1  | 220  | 160  | -2               |     |
| Cyclin E1                                     | Ccne1  | 142  | 130  | -2               |     |
| Cyclin-dependent kinase inhibitor 2B          | Cdkn2b | 2002 | 932  | -25              | *   |
| Cyclin-dependent kinase inhibitor 1C          | Cdkn1c | 4193 | 7008 | 5                |     |
| Transformed mouse 3T3 cell double minute 2    | Mdm2   | 2569 | 2470 | -1               |     |
| Caspase 3 apoptosis related cysteine protease | Casp3  | 31   | 26   | -2               |     |
| B-cell leukemia/lymphoma                      | Bcl2   | 55   | 59   | 1                |     |

**TGF pathway**

| Name                                                   | Symbol  | WT   | TG   | Trans. Diffscore | Sig |
|--------------------------------------------------------|---------|------|------|------------------|-----|
| Transforming growth factor beta 1                      | Tgfb1   | 73   | 51   | -6               |     |
| Transforming growth factor beta 2                      | Tgfb2   | 126  | 118  | -1               |     |
| Transforming growth factor beta 3                      | Tgfb3   | 1782 | 1430 | -4               |     |
| Transforming growth factor beta receptor 1             | Tgfr1   | 952  | 937  | 0                |     |
| Transforming growth factor beta receptor 2             | Tgfr2   | 4395 | 4060 | -1               |     |
| Transforming growth factor beta 1 induced transcript 1 | Tgfbli1 | 856  | 827  | -1               |     |
| Transforming growth factor beta 1 induced transcript 4 | Tgfbli4 | 165  | 96   | -10              | *   |
| Mitogen activated protein kinase kinase 4              | Map2k4  | 491  | 499  | 0                |     |
| Mitogen activated protein kinase kinase 3              | Map2k3  | 1542 | 1457 | -1               |     |
| Mitogen activated protein kinase 8                     | Mapk8   | 55   | 112  | 13               | *   |
| Mitogen activated protein kinase 9                     | Mapk9   | 856  | 927  | 1                |     |
| Mitogen activated protein kinase 14                    | Mapk14  | 440  | 483  | 1                |     |

**FGF pathway**

| Name                        | Symbol | WT  | TG  | Trans. Diffscore | Sig |
|-----------------------------|--------|-----|-----|------------------|-----|
| Fibroblast growth factor 1  | Fgf1   | -5  | 0   | 3                |     |
| Fibroblast growth factor 10 | Fgf10  | 219 | 247 | 3                |     |
| fibroblast growth factor 11 | Fgf11  | -5  | -3  | 1                |     |

|                                                         |        |      |      |    |
|---------------------------------------------------------|--------|------|------|----|
| fibroblast growth factor 12                             | Fgf12  | 1    | 2    | 1  |
| fibroblast growth factor 13                             | Fgf13  | 4    | 4    | 0  |
| fibroblast growth factor 13                             | Fgf13  | 139  | 119  | -4 |
| fibroblast growth factor 14                             | Fgf14  | 3    | 1    | -1 |
| fibroblast growth factor 15                             | Fgf15  | 0    | 1    | 0  |
| fibroblast growth factor 16                             | Fgf16  | -4   | 1    | 3  |
| fibroblast growth factor 17                             | Fgf17  | 1    | 0    | 0  |
| fibroblast growth factor 18                             | Fgf18  | 21   | 18   | -1 |
| fibroblast growth factor 20                             | Fgf20  | -6   | -7   | 0  |
| fibroblast growth factor 21                             | Fgf21  | 175  | 235  | 2  |
| fibroblast growth factor 12                             | Fgf22  | 8    | 9    | 0  |
| fibroblast growth factor 23                             | Fgf23  | 11   | 13   | 1  |
| fibroblast growth factor 3                              | Fgf3   | 6    | 5    | 0  |
| fibroblast growth factor 4                              | Fgf4   | -3   | -3   | 0  |
| fibroblast growth factor 5                              | Fgf5   | 0    | 0    | 0  |
| fibroblast growth factor 6                              | Fgf6   | -5   | -3   | 1  |
| fibroblast growth factor 7                              | Fgf7   | -9   | -10  | -1 |
| fibroblast growth factor 8                              | Fgf8   | 4    | -8   | -8 |
| fibroblast growth factor 9                              | Fgf9   | 65   | 57   | -1 |
| fibroblast growth factor binding protein 1              | Fgfbp1 | -7   | -10  | -1 |
| Fibroblast growth factor receptor 1                     | Fgfr1  | 20   | 17   | -1 |
| Fibroblast growth factor receptor 2                     | Fgfr2  | 3861 | 4211 | 1  |
| Fibroblast growth factor receptor 3                     | Fgfr3  | 7    | 12   | 2  |
| Fibroblast growth factor receptor 4                     | Fgfr4  | -3   | -2   | 0  |
| Fibroblast growth factor receptor-like 1 (Fgfr11) mRNA. | Fgfr11 | 256  | 251  | 0  |

#### IGF Pathway

| Name                                           | Symbol  | WT    | TG    | Trans. Diffscore | Sig |
|------------------------------------------------|---------|-------|-------|------------------|-----|
| Insulin-like growth factor 1                   | Igf1    | 844   | 898   | 1                |     |
| Insulin-like growth factor I receptor          | Igf1r   | 77    | 70    | -1               |     |
| Insulin-like growth factor binding protein 1   | Igfbp1  | -6    | -10   | -2               |     |
| Insulin-like growth factor binding protein 2   | Igfbp2  | 625   | 793   | 3                |     |
| Insulin-like growth factor binding protein 3   | Igfbp3  | 857   | 910   | 0                |     |
| Insulin-like growth factor binding protein 4   | Igfbp4  | 8609  | 8046  | -2               |     |
| Insulin-like growth factor binding protein 5   | Igfbp5  | 7959  | 8830  | 1                |     |
| Insulin-like growth factor binding protein 6   | Igfbp6  | 717   | 552   | -2               |     |
| Insulin-like growth factor binding protein 7   | Igfbp7  | 4759  | 3617  | -9               | *   |
| Insulin-like growth factor 2                   | Igf2    | 13693 | 17244 | 5                |     |
| Insulin-like growth factor 2 binding protein 1 | Igf2bp1 | 34    | 42    | 2                |     |
| Insulin-like growth factor 2 binding protein 3 | Igf2bp3 | 37    | 68    | 4                |     |
| Insulin-like growth factor 2 receptor          | Igf2r   | 1166  | 1304  | 1                |     |

#### Wnt Pathway

| Name                                               | Symbol | WT  | TG  | Trans. Diffscore | Sig |
|----------------------------------------------------|--------|-----|-----|------------------|-----|
| Catenin beta                                       | Catnb  | 777 | 666 | -3               |     |
| Dishevelled dsh homolog 1                          | Dvl1   | 557 | 523 | -1               |     |
| Dishevelled 2 dsh homolog                          | Dvl2   | 0   | 0   | 0                |     |
| Frizzled homolog 1                                 | Fzd1   | 33  | 18  | -8               |     |
| Frizzled homolog 8                                 | Fzd8   | 37  | 37  | 0                |     |
| Low density lipoprotein receptor-related protein 5 | Lrp5   | 216 | 236 | 1                |     |
| Low density lipoprotein receptor-related protein 6 | Lrp6   | 97  | 93  | -1               |     |

|                                              |         |      |      |    |
|----------------------------------------------|---------|------|------|----|
| Transcription factor 1                       | Tcf1    | 3    | -3   | -2 |
| Wingless-related MMTV integration site 3A    | Wnt3a   | -4   | -8   | -2 |
| Wingless-related MMTV integration site 5A    | Wnt5a   | 356  | 363  | 0  |
| Wingless-related MMTV integration site 9A    | Wnt9a   | 537  | 528  | 0  |
| Wingless-related MMTV integration site 10B   | Wnt10b  | 21   | 21   | 0  |
| Axin                                         | Axin    | 828  | 901  | 2  |
| Casein kinase 1 alpha 1 (Csnk1a1)            | Csnk1a1 | -5   | -6   | 0  |
| Dickkopf homolog 1 (Xenopus laevis)          | Dkk1    | 2    | 3    | 0  |
| Frizzled-related protein                     | Frzb    | 11   | 10   | 0  |
| Glycogen synthase kinase 3 beta              | Gsk3b   | 310  | 346  | 1  |
| Secreted frizzled-related sequence protein 1 | Sfrp1   | 2917 | 3106 | 0  |
| Secreted frizzled-related sequence protein 2 | Sfrp2   | 1033 | 989  | 0  |

### BMP signaling activator

| Name                                                                  | Symbol | WT   | TG   | Trans. Diffscore | Sig |
|-----------------------------------------------------------------------|--------|------|------|------------------|-----|
| Bone morphogenetic protein 1                                          | Bmp1   | 309  | 321  | 0                |     |
| Bone morphogenetic protein 10                                         | Bmp10  | 7    | 6    | 0                |     |
| Bone morphogenetic protein 15                                         | Bmp15  | 17   | 17   | 0                |     |
| Bone morphogenetic protein 2                                          | Bmp2   | -4   | -3   | 0                |     |
| BMP2 inducible kinase                                                 | Bmp2k  | 12   | 11   | -1               |     |
| Bone morphogenetic protein 3                                          | Bmp3   | 14   | 17   | 1                |     |
| Bone morphogenetic protein 4                                          | Bmp4   | 2381 | 2799 | 3                |     |
| Bone morphogenetic protein 5                                          | Bmp5   | -2   | -5   | -1               |     |
| Bone morphogenetic protein 6                                          | Bmp6   | -4   | -11  | -4               |     |
| Bone morphogenetic protein 7                                          | Bmp7   | 2    | 3    | 0                |     |
| Bone morphogenetic protein 8a                                         | Bmp8a  | 3    | 2    | -1               |     |
| Bone morphogenetic protein 8b                                         | Bmp8b  | -1   | -1   | 0                |     |
| BMP-binding endothelial regulator                                     | Bmper  | 2039 | 1611 | -4               |     |
| Bone morphogenetic protein receptor type 1A                           | Bmpr1a | 127  | 80   | -10              | *   |
| Bone morphogenetic protein receptor type 1B                           | Bmpr1b | 33   | 23   | -4               |     |
| Bone morphogenetic protein receptor type II (serine/threonine kinase) | Bmpr2  | 5    | 0    | -3               |     |
| SMAD family member 1                                                  | Smad1  | 231  | 162  | -7               | *   |
| SMAD family member 2                                                  | Smad2  | 257  | 245  | -1               |     |
| SMAD family member 3                                                  | Smad3  | 2003 | 2030 | 0                |     |
| SMAD family member 5                                                  | Smad5  | 764  | 750  | 0                |     |

### BMP signaling inhibitor

| Name                                                                                                | Symbol | WT   | TG   | Trans. Diffscore | Sig |
|-----------------------------------------------------------------------------------------------------|--------|------|------|------------------|-----|
| SMAD family member 4                                                                                | Smad4  | 2942 | 2958 | 0                |     |
| SMAD family member 6                                                                                | Smad6  | 301  | 264  | -1               |     |
| SMAD family member 7                                                                                | Smad7  | -8   | -13  | -2               |     |
| Follistatin (Fst) mRNA.                                                                             | Fst    | 637  | 519  | -2               |     |
| Similar to Follistatin-related protein 1 precursor (TGF-beta-inducible protein TSC-36) (Fstl) mRNA. | Fstl   | 402  | 439  | 2                |     |
| Follistatin-like 1 (Fstl1) mRNA.                                                                    | Fstl1  | 5847 | 5841 | 0                |     |
| Ferberus 1 homolog (Xenopus laevis) (Cer1) mRNA.                                                    | Cer1   | -1   | -1   | 0                |     |
| Growth differentiation factor 10 (Gdf10) mRNA.                                                      | Gdf10  | 1536 | 2009 | 2                |     |
| Snail homolog 2 (Drosophila) (Snai2) mRNA.                                                          | Snai2  | 901  | 860  | -1               |     |
| Twisted gastrulation homolog 1 (Drosophila) (Twsg1) mRNA.                                           | Twsg1  | 1863 | 1820 | 0                |     |

**Integrin Pathway**

| Name                                                                       | Symbol | WT   | TG   | Trans. Diffscore | Sig |
|----------------------------------------------------------------------------|--------|------|------|------------------|-----|
| A disintegrin and metalloprotease domain 23 (Adam23) mRNA.                 | Adam23 | 581  | 603  | 1                |     |
| A disintegrin and metalloproteinase domain 9 (meltrin gamma) (Adam9) mRNA. | Adam9  | 174  | 90   | -19              | *   |
| Integrin alpha 2b (Itga2b) mRNA.                                           | Itga2b | 0    | 1    | 0                |     |
| Integrin alpha 3 (Itga3) mRNA.                                             | Itga3  | 31   | 21   | -4               |     |
| Integrin alpha 4                                                           | Itga4  | 4    | 1    | -2               |     |
| Integrin alpha 6                                                           | Itga6  | 3    | 0    | -1               |     |
| Integrin alpha X                                                           | Itgax  | -1   | -5   | -2               |     |
| Integrin beta 5 (Itgb5) mRNA.                                              | Itgb5  | 1095 | 770  | -9               | *   |
| Integrin beta-like 1 (Itgbl1) mRNA.                                        | Itgbl1 | 35   | 23   | -4               |     |
| Sphingosine-1-phosphate phosphatase 1 (Sgpp1) mRNA.                        | Sgpp1  | 106  | 64   | -11              | *   |
| Secreted phosphoprotein 1 (Spp1) mRNA.                                     | Spp1   | 3959 | 1692 | -13              | *   |
| Transglutaminase 2 C polypeptide (Tgm2) mRNA.                              | Tgm2   | 97   | 62   | -3               |     |

**NF-kB Pathway**

| Name                                                                                        | Symbol  | WT  | TG   | Trans. Diffscore | Sig |
|---------------------------------------------------------------------------------------------|---------|-----|------|------------------|-----|
| Procollagen type II alpha 1 (Col2a1) mRNA.                                                  | Col2a1  | 64  | 150  | 4                |     |
| Procollagen type V alpha 2 (Col5a2) mRNA.                                                   | Col5a2  | 51  | 37   | -5               |     |
| Procollagen type III alpha 1 (Col3a1) mRNA.                                                 | Col3a1  | 468 | 371  | -3               |     |
| Procollagen type XI alpha 1                                                                 | Col11a1 | 4   | 4    | 0                |     |
| Discoidin domain receptor family member 1 (Ddr1) mRNA.                                      | Ddr1    | 296 | 253  | -3               |     |
| Nuclear factor of kappa light polypeptide gene enhancer in B-cells 2 p49/p100 (Nfkb2) mRNA. | Nfkb2   | 44  | 27   | -7               |     |
| B-cell leukemia/lymphoma 3 (Bcl3) mRNA.                                                     | Bcl3    | 41  | 26   | -6               |     |
| Nuclear factor of kappa light chain gene enhancer in B-cells 1 p105 (Nfkb1) mRNA.           | Nfkb1   | 565 | 555  | 0                |     |
| Inhibitor of kappaB kinase beta (Ikbkb) mRNA.                                               | Ikbkb   | 974 | 1028 | 1                |     |
| Inhibitor of kappaB kinase gamma (Ikbkg) mRNA.                                              | Ikbkg   | 325 | 307  | -1               |     |

**Other genes with altered expression**

| Name                                                                                                                     | Symbol   | WT   | TG   | Trans. Diffscore | Sig |
|--------------------------------------------------------------------------------------------------------------------------|----------|------|------|------------------|-----|
| Runt related transcription factor 1                                                                                      | Runx1    | 74   | 43   | -14              |     |
| Annexin A1                                                                                                               | Anxa1    | 194  | 112  | -16              | *   |
| caveolae protein                                                                                                         | Cav1     | 1433 | 875  | -16              | *   |
| Matrix metalloproteinase 3                                                                                               | Mmp3     | 107  | 61   | -13              | *   |
| Apolipoprotein D                                                                                                         | Apod     | 1218 | 1573 | 9                | *   |
| Mus musculus ATP-binding cassette sub-family F (GCN20) member 2 (Abcf2) mRNA.                                            | Abcf2    | 437  | 300  | -9               | *   |
| Mus musculus acyl-Coenzyme A dehydrogenase short/branched chain (Acadsb) mRNA.                                           | Acadsb   | 334  | 209  | -13              | *   |
| Mus musculus a disintegrin-like and metalloprotease (reprolysin type) with thrombospondin type 1 motif 2 (Adamts2) mRNA. | Adamts2  | 298  | 184  | -10              | *   |
| Mus musculus cDNA sequence AF155546 (AF155546) mRNA.                                                                     | AF155546 | 189  | 130  | -7               | *   |
| Mus musculus expressed sequence AI838661 (AI838661) mRNA.                                                                | AI838661 | 136  | 86   | -10              | *   |
| Mus musculus aldo-keto reductase family 1 member B3 (aldose reductase) (Akr1b3) mRNA.                                    | Akr1b3   | 306  | 201  | -11              | *   |
| Mus musculus aldehyde dehydrogenase family 3 subfamily A1 (Aldh3a1) mRNA.                                                | Aldh3a1  | 79   | 56   | -8               |     |
| Mus musculus aldehyde dehydrogenase family 6 subfamily A1 (Aldh6a1) mRNA.                                                | Aldh6a1  | 210  | 134  | -8               | *   |

|                                                                                                                 |               |      |      |     |   |
|-----------------------------------------------------------------------------------------------------------------|---------------|------|------|-----|---|
| Mus musculus actin related protein 2/3 complex subunit 5-like (Arpc5l) mRNA.                                    | Arpc5l        | 77   | 44   | -9  |   |
| Mus musculus N-acylsphingosine amidohydrolase 1 (Asah1) mRNA.                                                   | Asah1         | 231  | 149  | -10 | * |
| Mus musculus argininosuccinate synthetase 1 (Ass1) mRNA.                                                        | Ass1          | 271  | 189  | -8  | * |
| Mus musculus ATPase H <sup>+</sup> transporting lysosomal accessory protein 2 (Atp6ap2) mRNA.                   | Atp6ap2       | 189  | 120  | -11 | * |
| Mus musculus ATPase H <sup>+</sup> transporting V1 subunit A isoform 1 (Atp6v1a1) mRNA.                         | Atp6v1a1      | 277  | 179  | -11 | * |
| Mus musculus ATPase Cu <sup>++</sup> transporting alpha polypeptide (Atp7a) mRNA.                               | Atp7a         | 201  | 142  | -7  | * |
| Mus musculus expressed sequence AW822216 (AW822216) mRNA.                                                       | AW822216      | 69   | 40   | -9  |   |
| Mus musculus breast carcinoma amplified sequence 2 (Bcas2) mRNA.                                                | Bcas2         | 70   | 33   | -12 |   |
| Mus musculus catenin src (Catns) mRNA.                                                                          | Catns         | 226  | 170  | -10 | * |
| Mus musculus chemokine (C-C motif) ligand 8 (Ccl8) mRNA.                                                        | Ccl8          | 168  | 101  | -8  | * |
| Mus musculus CDC42 effector protein (Rho GTPase binding) 3 (Cdc42ep3) mRNA.                                     | Cdc42ep3      | 159  | 90   | -9  | * |
| Mus musculus carbohydrate sulfotransferase 12 (Chst12) mRNA.                                                    | Chst12        | 116  | 84   | -9  | * |
| Mus musculus collectin sub-family member 12 (Colec12) mRNA.                                                     | Colec12       | 110  | 80   | -9  | * |
| Mus musculus copine II (Cpne2) mRNA.                                                                            | Cpne2         | 142  | 108  | -8  | * |
| Mus musculus carnitine palmitoyltransferase 2 (Cpt2) mRNA.                                                      | Cpt2          | 192  | 118  | -10 | * |
| Mus musculus carnitine palmitoyltransferase 2 (Cpt2) mRNA.                                                      | Cpt2          | 1050 | 743  | -8  | * |
| Mus musculus cysteine and glycine-rich protein 1 (Csrp1) mRNA.                                                  | Csrp1         | 66   | 1025 | 21  | * |
| Mus musculus cathepsin B (Ctsb) mRNA.                                                                           | Ctsb          | 355  | 268  | -10 | * |
| Mus musculus DNA segment Chr 11 Brigham & Womens Genetics 0434 expressed (D11Bwg0434e) mRNA.                    | D11Bwg0434e   | 537  | 368  | -11 | * |
| Mus musculus DNA segment Chr 17 Wayne State University 94 expressed (D17Wsu94e) mRNA.                           | D17Wsu94e     | 81   | 51   | -11 |   |
| Mus musculus DNA segment Chr 19 ERATO Doi 721 expressed (D19Ert721e) mRNA.                                      | D19Ert721e    | 1529 | 1105 | -7  | * |
| Mus musculus dystroglycan 1 (Dag1) mRNA.                                                                        | Dag1          | 899  | 549  | -12 | * |
| Mus musculus DAZ associated protein 2 (Dazap2) mRNA.                                                            | Dazap2        | 575  | 389  | -8  | * |
| Mus musculus discoidin CUB and LCCL domain containing 1 (Dcbld1) mRNA.                                          | Dcbld1        | 90   | 62   | -8  |   |
| Mus musculus DEAD/H (Asp-Glu-Ala-Asp/His) box polypeptide 3 X-linked (Ddx3x) mRNA.                              | Ddx3x         | 83   | 43   | -12 |   |
| Mus musculus DEAH (Asp-Glu-Ala-His) box polypeptide 15 (Dhx15) mRNA.                                            | Dhx15         | 672  | 457  | -8  | * |
| Mus musculus dynein cytoplasmic light chain 1 (Dncl1) mRNA.                                                     | Dncl1         | 114  | 61   | -14 | * |
| Mus musculus dipeptidylpeptidase 7 (Dpp7) mRNA.                                                                 | Dpp7          | 1344 | 939  | -8  | * |
| Mus musculus deoxythymidylate kinase (Dtymk) mRNA.                                                              | Dtymk         | 224  | 137  | -8  | * |
| Mus musculus RIKEN cDNA E030024M05 gene (E030024M05Rik) mRNA.                                                   | E030024M05Rik | 128  | 86   | -7  | * |
| Mus musculus endothelial differentiation lysophosphatidic acid G-protein-coupled receptor 2 (Edg2) mRNA.        | Edg2          | 470  | 327  | -9  | * |
| Mus musculus embryonic ectoderm development (Eed) mRNA.                                                         | Eed           | 111  | 70   | -9  | * |
| Mus musculus EGL nine homolog 3 (C. elegans) (Egln3) mRNA.                                                      | Egln3         | 83   | 47   | -10 |   |
| Mus musculus excision repair cross-complementing rodent repair deficiency complementation group 1 (Ercc1) mRNA. | Ercc1         | 1969 | 1532 | -7  | * |
| Mus musculus excision repair cross-complementing rodent repair deficiency complementation group 1 (Ercc1) mRNA. | Ercc1         | 441  | 350  | -7  | * |
| Mus musculus endothelial cell-specific molecule 1 (Esm1) mRNA.                                                  | Esm1          | 74   | 43   | -11 |   |
| Mus musculus coagulation factor III (F3) mRNA.                                                                  | F3            | 437  | 223  | -9  | * |
| Mus musculus fatty acid synthase (Fasn) mRNA.                                                                   | Fasn          | 553  | 374  | -8  | * |
| Mus musculus four and a half LIM domains 2 (Fhl2) mRNA.                                                         | Fhl2          | 346  | 268  | -8  | * |
| Mus musculus retinoblastoma-like 2 (Rbl2) mRNA.                                                                 | Fts           | 160  | 116  | -8  | * |
| Mus musculus glucosaminyl (N-acetyl) transferase 2 I-branching enzyme (Gcnt2) transcript variant 3 mRNA.        | Gcnt2         | 112  | 74   | -7  | * |
| Mus musculus GLE1 RNA export mediator-like (yeast) (Gle1l) mRNA.                                                | Gle1l         | 83   | 51   | -9  |   |



|                                                                                                                                                                |           |       |       |     |   |
|----------------------------------------------------------------------------------------------------------------------------------------------------------------|-----------|-------|-------|-----|---|
| mRNA.                                                                                                                                                          |           |       |       |     |   |
| Mus musculus GDP-mannose pyrophosphorylase A (Gmppa) mRNA.                                                                                                     | Gmppa     | 126   | 92    | -7  | * |
| Mus musculus GNAS (guanine nucleotide binding protein alpha stimulating) complex locus (Gnas) mRNA.                                                            | Gnas      | 463   | 321   | -8  | * |
| Mus musculus glucose phosphate isomerase 1 (Gpi1) mRNA.                                                                                                        | Gpi1      | 68    | 45    | -8  |   |
| Mus musculus G-protein coupled receptor 88 (Gpr88) mRNA.                                                                                                       | Gpr88     | 214   | 158   | -9  | * |
| Mus musculus glutathione S-transferase mu 1 (Gstm1) mRNA.                                                                                                      | Gstm1     | 777   | 583   | -9  | * |
| Mus musculus glutathione S-transferase mu 6 (Gstm6) mRNA.                                                                                                      | Gstm6     | 222   | 165   | -10 | * |
| Mus musculus hydroxyacyl-Coenzyme A dehydrogenase/3-ketoacyl-Coenzyme A thiolase/enoyl-Coenzyme A hydratase (trifunctional protein) beta subunit (Hadhb) mRNA. | Hadhb     | 685   | 488   | -7  | * |
| Mus musculus HESB like domain containing 2 (Hbld2) mRNA.                                                                                                       | Hbld2     | 157   | 97    | -10 | * |
| Mus musculus histone deacetylase 2 (Hdac2) mRNA.                                                                                                               | Hdac2     | 707   | 469   | -8  | * |
| Mus musculus histone 1 H2bc (Hist1h2bc) mRNA.                                                                                                                  | Hist1h2bc | 2117  | 1415  | -10 | * |
| Mus musculus histone 1 H2bh (Hist1h2bh) mRNA.                                                                                                                  | Hist1h2bh | 905   | 687   | -9  | * |
| Mus musculus histone 1 H2bj (Hist1h2bj) mRNA.                                                                                                                  | Hist1h2bj | 1533  | 1163  | -8  | * |
| Mus musculus histone 1 H2bl (Hist1h2bl) mRNA.                                                                                                                  | Hist1h2bl | 1023  | 813   | -8  | * |
| Mus musculus histone 1 H2bn (Hist1h2bn) mRNA.                                                                                                                  | Hist1h2bn | 886   | 608   | -11 | * |
| Mus musculus histone 1 H4a (Hist1h4a) mRNA.                                                                                                                    | Hist1h4a  | 209   | 163   | -8  | * |
| Mus musculus histone 1 H4f (Hist1h4f) mRNA.                                                                                                                    | Hist1h4f  | 108   | 66    | -16 | * |
| Mus musculus histone 1 H4i (Hist1h4i) mRNA.                                                                                                                    | Hist1h4i  | 109   | 78    | -10 | * |
| Mus musculus histone 1 H4j (Hist1h4j) mRNA.                                                                                                                    | Hist1h4j  | 152   | 117   | -8  | * |
| Mus musculus histone 1 H4m (Hist1h4m) mRNA.                                                                                                                    | Hist1h4m  | 187   | 139   | -10 | * |
| Mus musculus hematological and neurological expressed sequence 1 (Hn1) mRNA.                                                                                   | Hn1       | 329   | 201   | -11 | * |
| Mus musculus heterogeneous nuclear ribonucleoprotein K (Hnrpk) mRNA.                                                                                           | Hnrpk     | 112   | 75    | -11 | * |
| Mus musculus heat shock protein 8 (Hspa8) mRNA.                                                                                                                | Hspa8     | 1720  | 1084  | -8  | * |
| Mus musculus heat shock protein 1 alpha (Hspca) mRNA.                                                                                                          | Hspca     | 145   | 56    | -27 | * |
| Mus musculus heat shock protein 1 (chaperonin) (Hspd1) mRNA.                                                                                                   | Hspd1     | 90    | 53    | -11 |   |
| Mus musculus isocitrate dehydrogenase 2 (NADP+) mitochondrial (Idh2) mRNA.                                                                                     | Idh2      | 192   | 112   | -9  | * |
| Mus musculus interferon alpha responsive gene (Ifrg15) mRNA.                                                                                                   | Ifrg15    | 92    | 66    | -8  |   |
| Mus musculus inhibin beta-B (Inhbb) mRNA.                                                                                                                      | Inhbb     | 179   | 80    | -10 | * |
| Mus musculus insulin induced gene 2 (Insig2) mRNA.                                                                                                             | Insig2    | 92    | 64    | -7  |   |
| Mus musculus immunoglobulin superfamily containing leucine-rich repeat (Islr) mRNA.                                                                            | Islr      | 753   | 1078  | 9   | * |
| Mus musculus kidney cell line derived transcript 1 (Kdt1) mRNA.                                                                                                | Kdt1      | 179   | 111   | -11 | * |
|                                                                                                                                                                | Kng1      | 96    | 61    | -12 |   |
| Mus musculus karyopherin (importin) beta 1 (Kpnb1) mRNA.                                                                                                       | Kpnb1     | 132   | 63    | -16 | * |
|                                                                                                                                                                | Lmo7      | 100   | 56    | -8  | * |
| Mus musculus hypothetical LOC223653 (LOC223653) mRNA.                                                                                                          | LOC223653 | 89    | 115   | 7   | * |
| Mus musculus similar to Alpha enolase (2-phospho-D-glycerate hydro-lyase) (Non-neural enolase) (NNE) (Enolase 1) (LOC229810) mRNA.                             | LOC229810 | 147   | 96    | -7  | * |
| Mus musculus similar to elongation factor 1 alpha (LOC245251) mRNA.                                                                                            | LOC245251 | 12464 | 16960 | 14  | * |
| Mus musculus similar to adenine nucleotide translocase (LOC277856) mRNA.                                                                                       | LOC277856 | 222   | 140   | -11 | * |
| Mus musculus similar to Ab2-450 (LOC383249) mRNA.                                                                                                              | LOC383249 | 131   | 83    | -12 | * |
| Mus musculus similar to adenine nucleotide translocase (LOC384206) mRNA.                                                                                       | LOC384206 | 306   | 199   | -10 | * |
| Mus musculus similar to Ac1147 (LOC385086) mRNA.                                                                                                               | LOC385086 | 4805  | 6900  | 12  | * |
| Mus musculus similar to RNP particle component (LOC386124) mRNA.                                                                                               | LOC386124 | 101   | 198   | 15  | * |
| Mus musculus leucine rich repeat containing 15 (Lrrc15) mRNA.                                                                                                  | Lrrc15    | 534   | 355   | -16 | * |
| Mus musculus LSM2 homolog U6 small nuclear RNA associated (S.                                                                                                  | Lsm2      | 231   | 177   | -8  | * |

|                                                                                                                                            |          |      |      |     |   |
|--------------------------------------------------------------------------------------------------------------------------------------------|----------|------|------|-----|---|
| cerevisiae) (Lsm2) mRNA.                                                                                                                   |          |      |      |     |   |
| Mus musculus lumican (Lum) mRNA.                                                                                                           | Lum      | 1769 | 1238 | -8  | * |
| Mus musculus lysophospholipase 1 (Lypla1) mRNA.                                                                                            | Lypla1   | 68   | 45   | -10 |   |
| Mus musculus mannose-6-phosphate receptor cation dependent (M6pr) mRNA.                                                                    | M6pr     | 962  | 712  | -7  | * |
| Mus musculus microtubule-associated protein 1 light chain 3 beta (Map1lc3b) mRNA.                                                          | Map1lc3b | 845  | 582  | -8  | * |
| Mus musculus malate dehydrogenase 2 NAD (mitochondrial) (Mdh2) mRNA.                                                                       | Mdh2     | 79   | 51   | -7  |   |
| Mus musculus matrix gamma-carboxyglutamate (gla) protein (Mglap) mRNA.                                                                     | Mglap    | 9928 | 7619 | -7  | * |
| Mus musculus mitochondrial ribosomal protein S25 (Mrps25) mRNA.                                                                            | Mrps25   | 121  | 84   | -8  | * |
| Mus musculus microtubule-associated protein 1 B (Mtap1b) mRNA.                                                                             | Mtap1b   | 143  | 82   | -8  | * |
|                                                                                                                                            | Mtrf11   | 77   | 40   | -10 |   |
| Mus musculus nascent polypeptide-associated complex alpha polypeptide (Naca) mRNA.                                                         | Naca     | 386  | 254  | -8  | * |
| Mus musculus nanos homolog 1 (Drosophila) (Nanos1) mRNA.                                                                                   | Nanos1   | 78   | 58   | -7  |   |
| Mus musculus nucleosome assembly protein 1-like 1 (Nap111) mRNA.                                                                           | Nap111   | 73   | 40   | -10 |   |
| Mus musculus NADH dehydrogenase (ubiquinone) 1 alpha subcomplex 6 (B14) (Ndufa6) mRNA.                                                     | Ndufa6   | 126  | 81   | -8  | * |
| Mus musculus naked cuticle 2 homolog (Drosophila) (Nkd2) mRNA.                                                                             | Nkd2     | 307  | 214  | -8  | * |
| Mus musculus naked cuticle 2 homolog (Drosophila) (Nkd2) mRNA.                                                                             | Nkd2     | 178  | 141  | -7  | * |
| Mus musculus Niemann Pick type C2 (Npc2) mRNA.                                                                                             | Npc2     | 1027 | 689  | -9  | * |
| Mus musculus nucleoplasmin 3 (Npm3) mRNA.                                                                                                  | Npm3     | 709  | 1030 | 8   | * |
| Mus musculus natriuretic peptide receptor 2 (Npr2) mRNA.                                                                                   | Npr2     | 611  | 440  | -9  | * |
| Mus musculus nucleoporin 62 (Nup62) mRNA.                                                                                                  | Nup62    | 136  | 88   | -14 | * |
| Mus musculus nuclear transport factor 2 (Nutf2) mRNA.                                                                                      | Nutf2    | 208  | 135  | -8  | * |
| Mus musculus osteoclast inhibitory lectin (Ocil) mRNA.                                                                                     | Ocil     | 1875 | 1299 | -10 | * |
| Mus musculus oxidation resistance 1 (Oxr1) mRNA.                                                                                           | Oxr1     | 207  | 138  | -9  | * |
| Mus musculus poly A binding protein cytoplasmic 1 (Pabpc1) mRNA.                                                                           | Pabpc1   | 2231 | 1417 | -10 | * |
| Mus musculus phosphoribosylaminoimidazole carboxylase phosphoribosylaminoribosylaminoimidazole succinocarboxamide synthetase (Paics) mRNA. | Paics    | 160  | 98   | -8  | * |
| Mus musculus progesterone receptor membrane component 1 (Pgrmc1) mRNA.                                                                     | Pgrmc1   | 69   | 33   | -14 |   |
| Mus musculus pleckstrin homology-like domain family A member 3 (Phlda3) mRNA.                                                              | Phlda3   | 159  | 105  | -12 | * |
| Mus musculus phosphatidylinositol 3 kinase regulatory subunit polypeptide 3 (p55) (Pik3r3) mRNA.                                           | Pik3r3   | 514  | 382  | -8  | * |
| Mus musculus phosphatidylinositol transfer protein membrane-associated 2 (Pitpnm2) mRNA.                                                   | Pitpnm2  | 144  | 110  | -7  | * |
| Mus musculus protein kinase inhibitor gamma (Pkig) mRNA.                                                                                   | Pkig     | 73   | 53   | -7  |   |
| Mus musculus pyruvate kinase muscle (Pkm2) mRNA.                                                                                           | Pkm2     | 253  | 163  | -14 | * |
| Mus musculus procollagen lysine 2-oxoglutarate 5-dioxygenase 2 (Plod2) mRNA.                                                               | Plod2    | 74   | 43   | -8  |   |
| Mus musculus plastin 3 (T-isoform) (Pls3) mRNA.                                                                                            | Pls3     | 833  | 558  | -8  | * |
| Mus musculus polymerase (RNA) II (DNA directed) polypeptide G (Polr2g) mRNA.                                                               | Polr2g   | 329  | 213  | -8  | * |
| Mus musculus protective protein for beta-galactosidase (Ppgb) mRNA.                                                                        | Ppgb     | 229  | 150  | -10 | * |
| Mus musculus protein phosphatase 4 regulatory subunit 1 (Ppp4r1) mRNA.                                                                     | Ppp4r1   | 81   | 45   | -11 |   |
| Mus musculus peroxiredoxin 6 (Prdx6) mRNA.                                                                                                 | Prdx6    | 130  | 91   | -8  | * |
| Mus musculus protease (prosome macropain) 26S subunit ATPase 5 (Psmc5) mRNA.                                                               | Psmc5    | 833  | 635  | -10 | * |
| Mus musculus proteasome (prosome macropain) 26S subunit non-ATPase 10 (Psm10) mRNA.                                                        | Psm10    | 79   | 55   | -8  |   |
| Mus musculus proteasome (prosome macropain) 26S subunit non-                                                                               | Psm14    | 103  | 64   | -9  | * |

|                                                                                               |          |       |       |     |   |
|-----------------------------------------------------------------------------------------------|----------|-------|-------|-----|---|
| ATPase 14 (Psm14) mRNA.                                                                       |          |       |       |     |   |
| Mus musculus RAB27A member RAS oncogene family (Rab27a) mRNA.                                 | Rab27a   | 668   | 441   | -9  | * |
| Mus musculus RAB33B member of RAS oncogene family (Rab33b) mRNA.                              | Rab33b   | 186   | 121   | -8  | * |
| Mus musculus RAB34 member of RAS oncogene family (Rab34) mRNA.                                | Rab34    | 919   | 615   | -13 | * |
| Mus musculus retinoblastoma binding protein 7 (Rbbp7) mRNA.                                   | Rbbp7    | 116   | 72    | -8  | * |
| Mus musculus ring finger and CHY zinc finger domain containing 1 (Rchy1) mRNA.                | Rchy1    | 83    | 54    | -9  |   |
| Mus musculus ral guanine nucleotide dissociation stimulator-like 1 (Rgl1) mRNA.               | Rgl1     | 226   | 80    | -25 | * |
| Mus musculus regulator of G-protein signalling 10 (Rgs10) mRNA.                               | Rgs10    | 244   | 152   | -12 | * |
| Mus musculus regulator of G-protein signaling 19 interacting protein 1 (Rgs19ip1) mRNA.       | Rgs19ip1 | 80    | 57    | -7  |   |
| Mus musculus Ras and Rab interactor 2 (Rin2) mRNA.                                            | Rin2     | 82    | 50    | -11 |   |
| Mus musculus retroviral integration site 2 (Ris2) mRNA.                                       | Ris2     | 395   | 267   | -12 | * |
| Mus musculus ribonuclease RNase A family 4 (Rnase4) mRNA.                                     | Rnase4   | 641   | 458   | -8  | * |
| Mus musculus ring finger protein 11 (Rnf11) mRNA.                                             | Rnf11    | 488   | 316   | -9  | * |
| Mus musculus ring finger protein 7 (Rnf7) mRNA.                                               | Rnf7     | 938   | 685   | -7  | * |
| Mus musculus arginyl aminopeptidase (aminopeptidase B) (Rnpep) mRNA.                          | Rnpep    | 711   | 539   | -8  | * |
| Mus musculus ribosomal protein L41 (Rpl41) mRNA.                                              | Rpl41    | 25711 | 33323 | 11  | * |
| Mus musculus RNA polymerase 1-1 (Rpo1-1) mRNA.                                                | Rpo1-1   | 124   | 81    | -7  | * |
| Mus musculus S100 calcium binding protein A4 (S100a4) mRNA.                                   | S100a4   | 713   | 422   | -11 | * |
|                                                                                               | Scfd1    | 123   | 76    | -9  | * |
| Mus musculus sodium channel voltage-gated type I beta polypeptide (Scn1b) mRNA.               | Scn1b    | 252   | 193   | -7  | * |
| Mus musculus scotin gene (Scotin) mRNA.                                                       | Scotin   | 129   | 93    | -9  | * |
| Mus musculus succinate dehydrogenase complex subunit D integral membrane protein (Sdhb) mRNA. | Sdhb     | 89    | 36    | -17 |   |
| Mus musculus SEC63-like (S. cerevisiae) (Sec63) mRNA.                                         | Sec63    | 99    | 66    | -8  |   |
|                                                                                               | Seplx1   | 117   | 88    | -8  | * |
|                                                                                               | Seplx1   | 293   | 230   | -8  | * |
| Mus musculus sphingosine-1-phosphate phosphatase 1 (Sgpp1) mRNA.                              | Sgpp1    | 106   | 64    | -11 | * |
|                                                                                               | Slc35b4  | 971   | 775   | -7  | * |
|                                                                                               | Slc7a6   | 71    | 42    | -11 |   |
| Mus musculus small nuclear ribonucleoprotein polypeptide A (Snrpa) mRNA.                      | Snrpa    | 138   | 93    | -13 | * |
| Mus musculus small nuclear ribonucleoprotein polypeptide A (Snrpa) mRNA.                      | Snrpa    | 139   | 105   | -8  | * |
| Mus musculus sorting nexin 7 (Snx7) mRNA.                                                     | Snx7     | 226   | 150   | -8  | * |
| Mus musculus synovial sarcoma translocation Chromosome 18 (Ss18) mRNA.                        | Ss18     | 124   | 74    | -11 | * |
| Mus musculus suppression of tumorigenicity 13 (St13) mRNA.                                    | St13     | 86    | 49    | -11 |   |
| Mus musculus beta galactoside alpha 26 sialyltransferase 1 (St6gal1) mRNA.                    | St6gal1  | 317   | 230   | -10 | * |
| Mus musculus serine/threonine kinase 17b (apoptosis-inducing) (Stk17b) mRNA.                  | Stk17b   | 181   | 107   | -12 | * |
| Mus musculus sulfatase 1 (Sulf1) mRNA.                                                        | Sulf1    | 1083  | 769   | -9  | * |
| Mus musculus sulfatase 1 (Sulf1) mRNA.                                                        | Sulf1    | 644   | 475   | -8  | * |
| Mus musculus synaptophysin-like protein (Sypl) transcript variant 1 mRNA.                     | Sypl     | 815   | 567   | -9  | * |
| Mus musculus TAR (HIV) RNA binding protein 2 (Tarbp2) mRNA.                                   | Tarbp2   | 295   | 202   | -9  | * |
| Mus musculus t-complex-associated-testis-expressed 1-like (Tcte11) mRNA.                      | Tcte11   | 355   | 202   | -14 | * |
| Mus musculus telomerase binding protein p23 (Tebp) mRNA.                                      | Tebp     | 104   | 68    | -8  | * |

|                                                                                          |         |      |      |     |   |
|------------------------------------------------------------------------------------------|---------|------|------|-----|---|
| Mus musculus testis expressed gene 261 (Tex261) mRNA.                                    | Tex261  | 347  | 221  | -10 | * |
| Mus musculus testis expressed gene 27 (Tex27) mRNA.                                      | Tex27   | 1373 | 1014 | -8  | * |
| Mus musculus transmembrane 4 superfamily member 8 (Tm4sf8) mRNA.                         | Tm4sf8  | 408  | 302  | -9  | * |
| Mus musculus tumor protein D52-like 2 (Tpd52l2) mRNA.                                    | Tpd52l2 | 238  | 169  | -8  | * |
| Mus musculus translocated promoter region (Tpr) mRNA.                                    | Tpr     | 844  | 532  | -13 | * |
| Mus musculus tweety homolog 2 (Drosophila) (Ttyh2) mRNA.                                 | Ttyh2   | 593  | 467  | -8  | * |
|                                                                                          | Txndc7  | 93   | 57   | -9  |   |
| Mus musculus ubiquitin-conjugating enzyme E2 variant 1 (Ube2v1) mRNA.                    | Ube2v1  | 279  | 203  | -9  | * |
|                                                                                          | Uck1    | 258  | 168  | -11 | * |
| Mus musculus ubiquinol-cytochrome c reductase binding protein (Uqcrb) mRNA.              | Uqcrb   | 167  | 105  | -9  | * |
| Mus musculus ubiquitin specific protease 1 (Usp1) mRNA.                                  | Usp1    | 86   | 47   | -10 |   |
| Mus musculus vesicle-associated membrane protein associated protein A (Vapa) mRNA.       | Vapa    | 156  | 96   | -9  | * |
| Mus musculus vesicle-associated membrane protein associated protein B and C (Vapb) mRNA. | Vapb    | 518  | 797  | 14  | * |
| Mus musculus vacuolar protein sorting 29 (S. pombe) (Vps29) mRNA.                        | Vps29   | 217  | 137  | -9  | * |
| Mus musculus WAS protein family member 2 (Wasf2) mRNA.                                   | Wasf2   | 535  | 375  | -8  | * |
| Y box protein 3                                                                          | Ybx3    | 506  | 330  | -12 | * |
| Mus musculus zinc finger CCHC domain containing 6 (Zcchc6) mRNA.                         | Zcchc6  | 229  | 142  | -10 | * |
| Mus musculus zinc finger protein 148 (Zfp148) mRNA.                                      | Zfp148  | 359  | 228  | -9  | * |
| Mus musculus zinc finger protein 313 (Zfp313) mRNA.                                      | Zfp313  | 157  | 107  | -8  | * |
| Mus musculus zinc finger protein 346 (Zfp346) mRNA.                                      | Zfp346  | 73   | 37   | -14 |   |

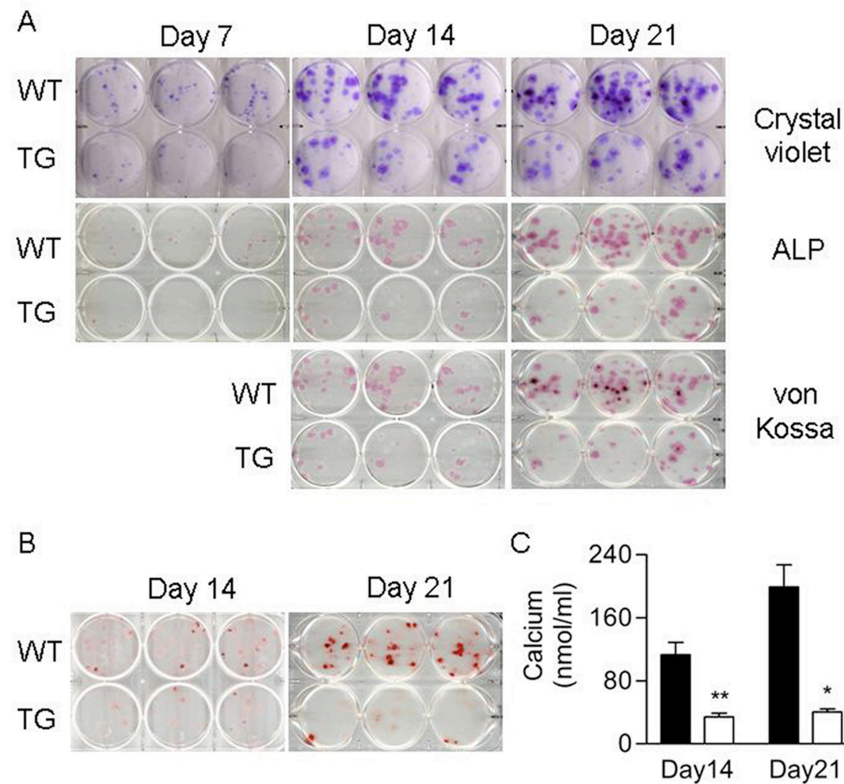

**Supplementary Figure 1.** Cell growth and differentiation were reduced in female Col3.6-HSD2 (TG) bone marrow stromal cell cultures. A) Crystal violet, alkaline phosphatase (ALP), von Kossa staining in bone marrow stromal cell cultures from 7-week-old wild type (WT) and TG mice. B) Alizarin red staining in day 14 and day 21 bone marrow stromal cultures from 7-week-old WT and TG mice. C) Quantification of alizarin red staining. Each value is the mean  $\pm$  SD for 3 samples per group and each experiment has been performed at least twice with similar results. Black bars, WT; White bars, TG. \*Different than WT, \* $p < 0.05$ , \*\* $p < 0.01$ .
